# Supplementary material
Source: PubMed Central journal article supplement (PMC4937503)
Supplement: 10.1074_M115.057448_mcp.M115.057448-1.pdf [file 10.1074_M115.057448_mcp.M115.057448-1.pdf]

**Supplemental information for Multi-dimensional Proteomics Reveals a Role of UHRF2 in the Regulation of Epithelial-Mesenchymal Transition (EMT)**

This file contains supplemental figures 1-7 and their legends; supplemental tables 3-4; the description of supplemental tables 1-7 and supplemental methods.

## Supplemental figures

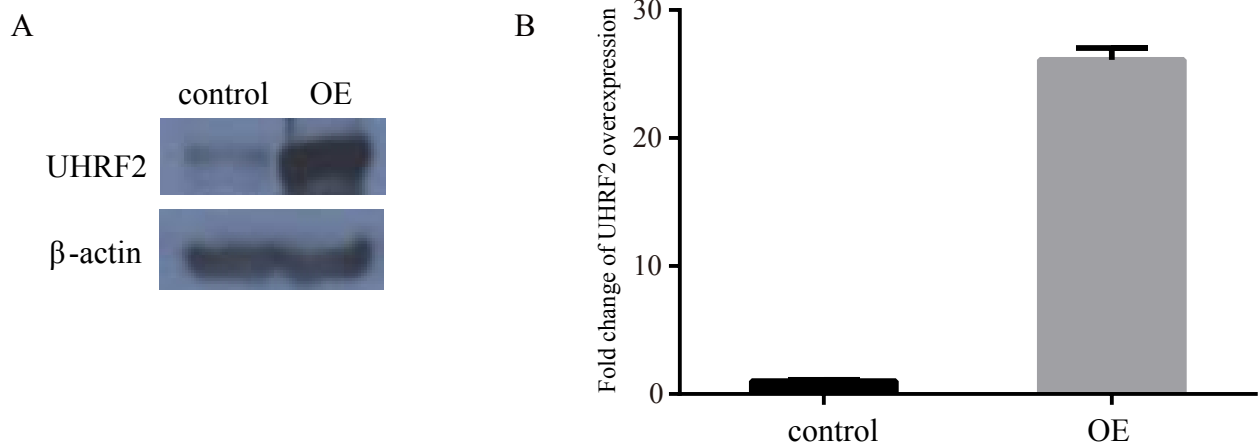

**Supplementary Figure 1. UHRF2 ectopic overexpression level in gastric cancer cell line MKN74 was determined by WB and MS. (A) UHRF2 overexpression level was detected by WB. (B) The expression intensity of UHRF2 in control and OE cells was monitored by MS and the relative overexpression level was shown.**

A

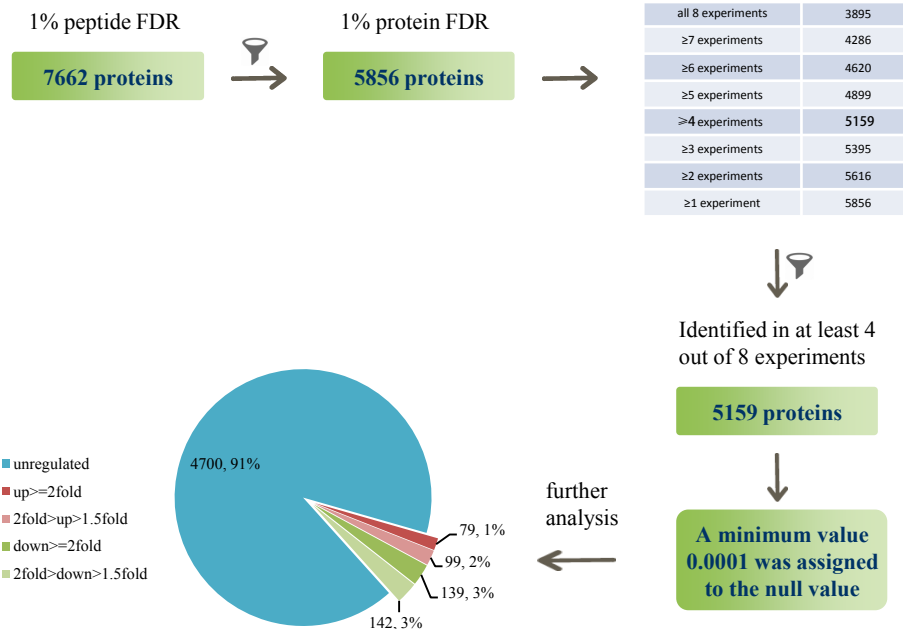

B

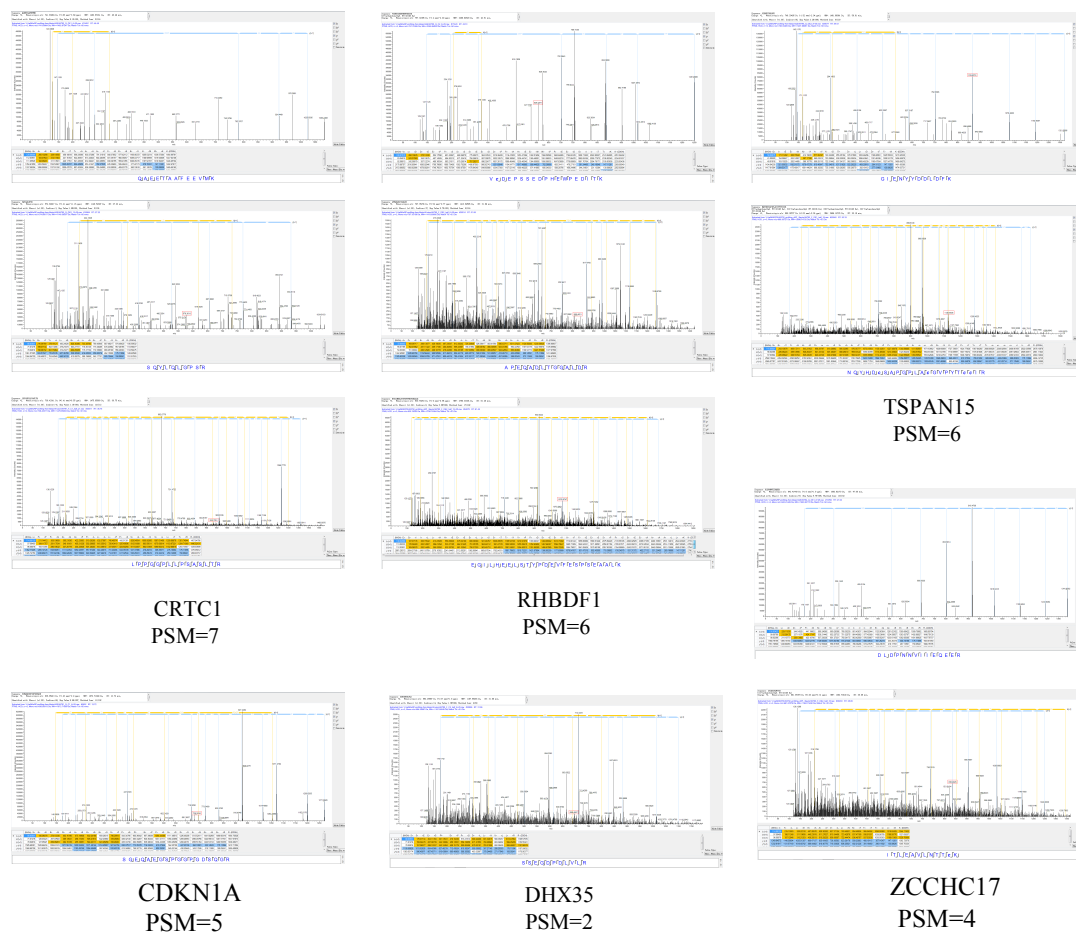

**Supplementary Figure 2. The processing of whole lysate profiling data and manual validation of some changed proteins.** (A) A total of 7662 proteins were identified at 1% peptide FDR. With the filter of 1% FDR on protein level as a cutoff, 5856 proteins were retained. The numbers of proteins shared in different experiments were listed and proteins identified in at least four out of eight experiments were used for further analysis. The distribution of protein expression changes upon UHRF2 overexpression was displayed. (B) Manual validation of 6 proteins identified by minimum number spectrum with 2-7 psms.

A

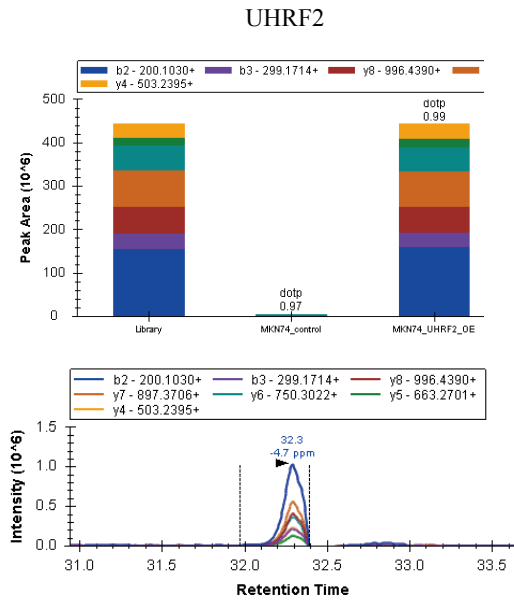

B

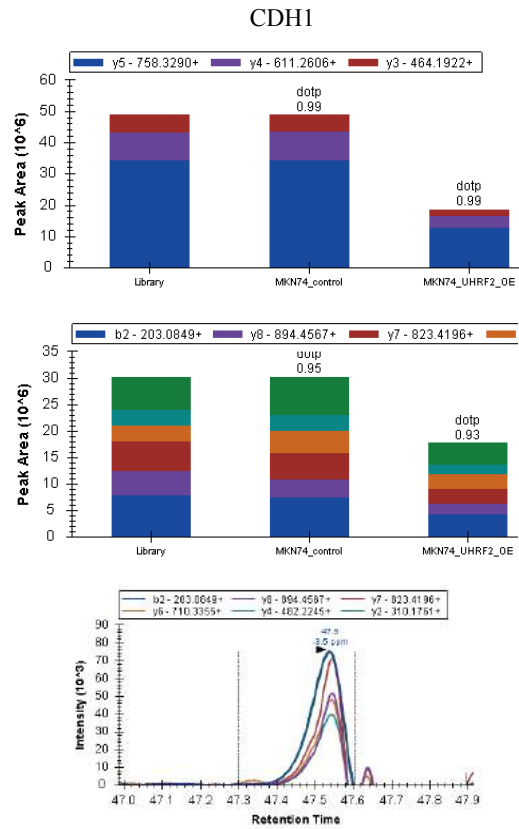

C

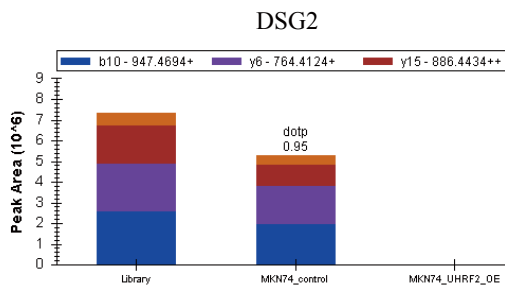

D

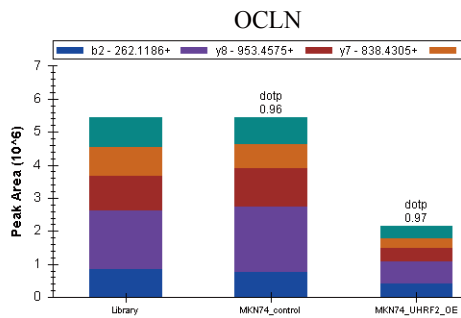

E

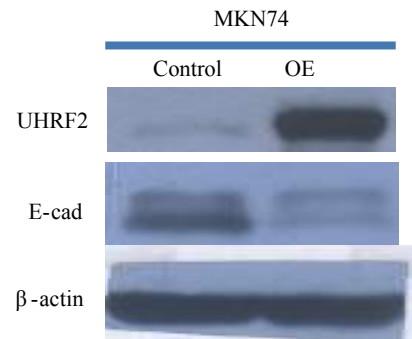

**Supplementary Figure 3. The repression of three epithelial proteins CDH1, DSG2 and OCLN by UHRF2 were validated by PRM quantification.** (A) UHRF2 overexpression was detected by PRM. Up panel shows intensities of selected peptide of UHRF2 in control and OE cells. Down panel exhibits the transition of the selected peptide. (B) The intensity decrease of CDH1 peptides was monitored in OE cells. (C) Expression change of DSG2 in control and OE cells. (D) Expression change of OCLN was quantified in control and OE cells. (E) The repression of CDH1 by UHRF2 was validated with WB.

A

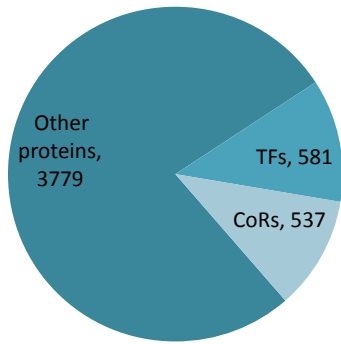

B

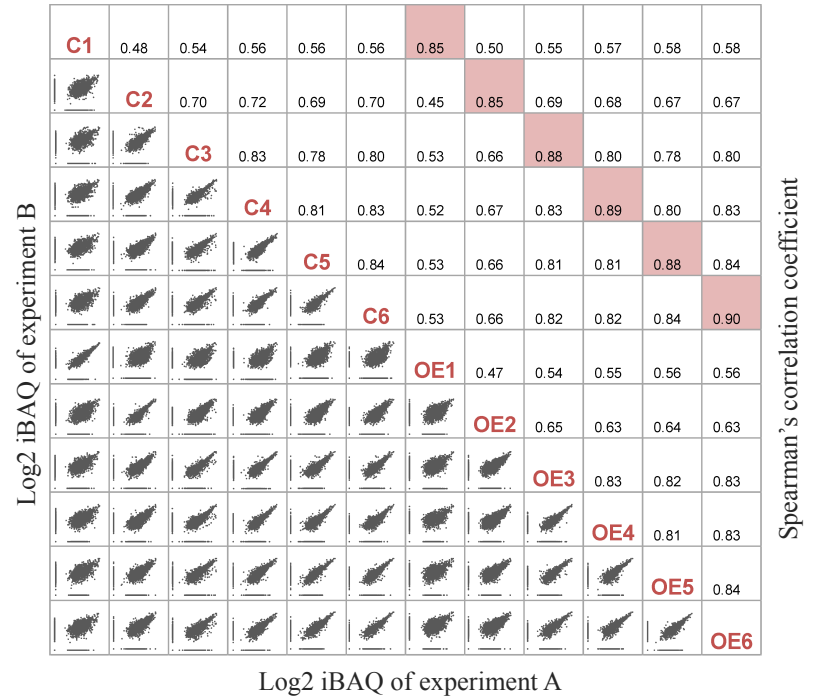

C

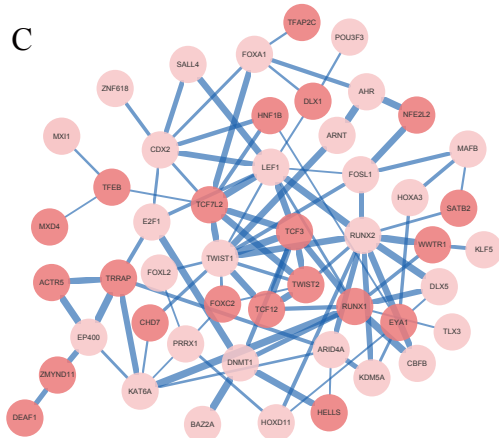

D

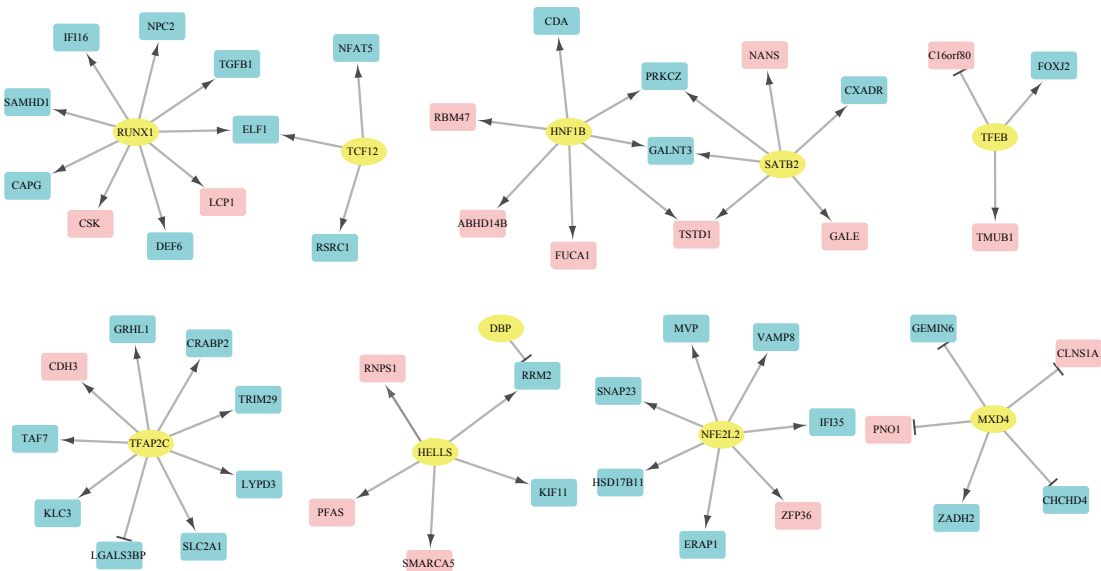

**Supplementary Figure 4.** (A) Classification of proteins identified in TFRE data. (B) Pairwise scatter plots of the experiments. X and y axes represented log<sub>2</sub> iBAQ intensity for experiments in corresponding columns and rows, respectively. (C) The network of altered TFs with interaction score > 0.4. (D) Activated TFs and their regulated targets.

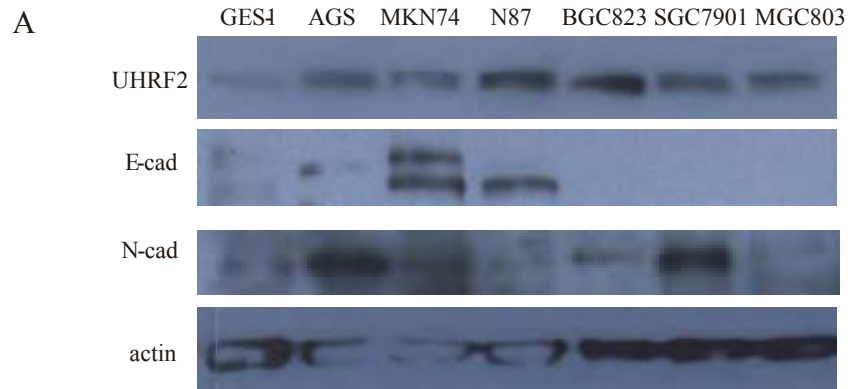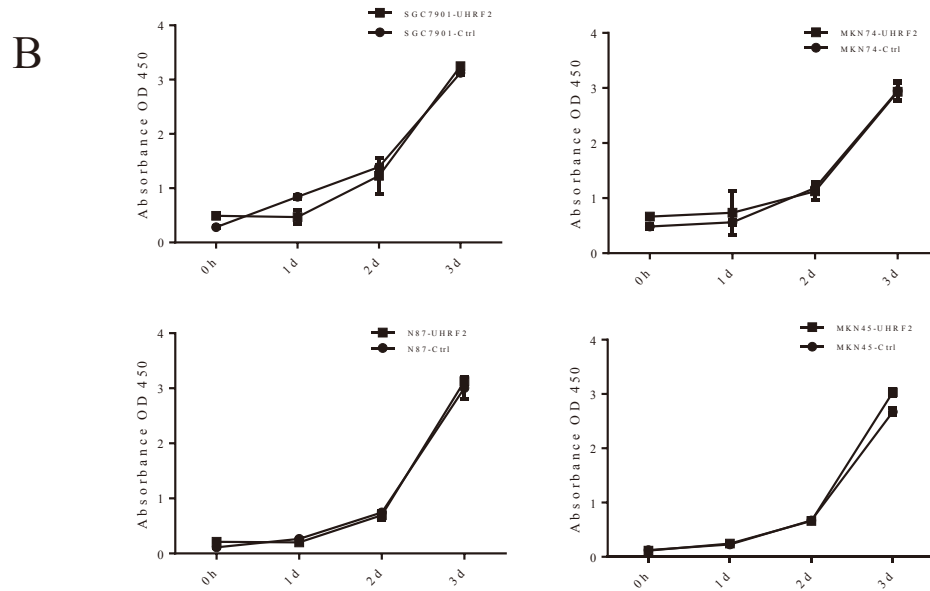

**Supplementary Figure 5.** (A) The expression levels of UHRF2, E-cad and N-cad in different gastric cancer cell lines. (B) UHRF2 did not affect the growth of four gastric cancer cell lines in our experiments.

A

| Rank | Motif | P-value | Log P-value | % of Targets | % of Background | STD (Bg STD)    |
|------|-------|---------|-------------|--------------|-----------------|-----------------|
| 1    |       | 1e-73   | -1.691e+02  | 23.62%       | 12.82%          | 54.7bp (59.0bp) |
| 2    |       | 1e-30   | -7.001e+01  | 34.95%       | 26.45%          | 54.4bp (63.1bp) |
| 3    |       | 1e-27   | -6.294e+01  | 35.47%       | 27.37%          | 55.9bp (59.3bp) |
| 4    |       | 1e-26   | -6.061e+01  | 15.07%       | 9.58%           | 54.2bp (63.5bp) |
| 5    |       | 1e-21   | -5.021e+01  | 19.93%       | 14.18%          | 54.8bp (58.9bp) |
| 6    |       | 1e-20   | -4.610e+01  | 26.94%       | 20.66%          | 54.4bp (64.8bp) |
| 7    |       | 1e-19   | -4.523e+01  | 31.89%       | 25.26%          | 55.2bp (59.7bp) |
| 8    |       | 1e-19   | -4.506e+01  | 9.39%        | 5.66%           | 52.3bp (59.6bp) |
| 9    |       | 1e-18   | -4.150e+01  | 0.31%        | 0.00%           | 53.4bp (23.0bp) |
| 10   |       | 1e-17   | -3.991e+01  | 0.26%        | 0.00%           | 53.3bp (18.5bp) |
| 11   |       | 1e-15   | -3.672e+01  | 0.31%        | 0.01%           | 58.9bp (23.5bp) |
| 12   |       | 1e-15   | -3.658e+01  | 35.73%       | 29.56%          | 56.4bp (58.8bp) |
| 13   |       | 1e-14   | -3.330e+01  | 1.54%        | 0.46%           | 55.0bp (63.5bp) |
| 14   |       | 1e-14   | -3.285e+01  | 0.29%        | 0.01%           | 51.8bp (50.5bp) |
| 15   |       | 1e-13   | -3.124e+01  | 10.91%       | 7.50%           | 56.2bp (60.7bp) |
| 16   |       | 1e-13   | -3.037e+01  | 1.44%        | 0.43%           | 48.6bp (58.0bp) |

B

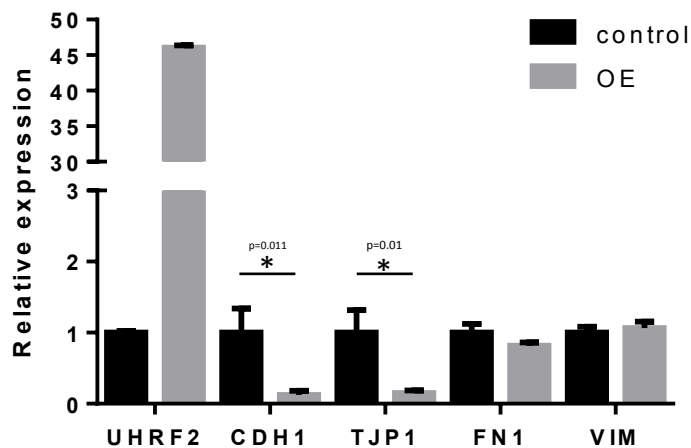

Supplementary Figure 6. UHRF2 binding motifs enriched in ChIP-seq experiment are listed as the rank of enrichment p-value(A). The RNA levels of several other EMT markers in addition to CDH1 were detected. Epithelial gene TJP1 was also repressed while mesenchymal makers VIM and FN1 were not significantly changed upon UHRF2 overexpression(B).

A

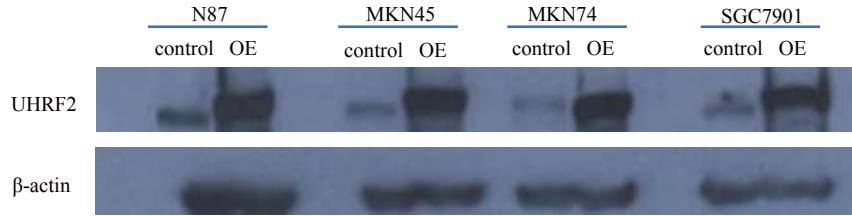

B

| IP/MS with USP7 antibody |             |                 |
|--------------------------|-------------|-----------------|
| giAccession              | Gene symbol | Unique Peptides |
| gi150378533              | USP7        | 75              |
| gi23312364               | UHRF2       | 2               |

C

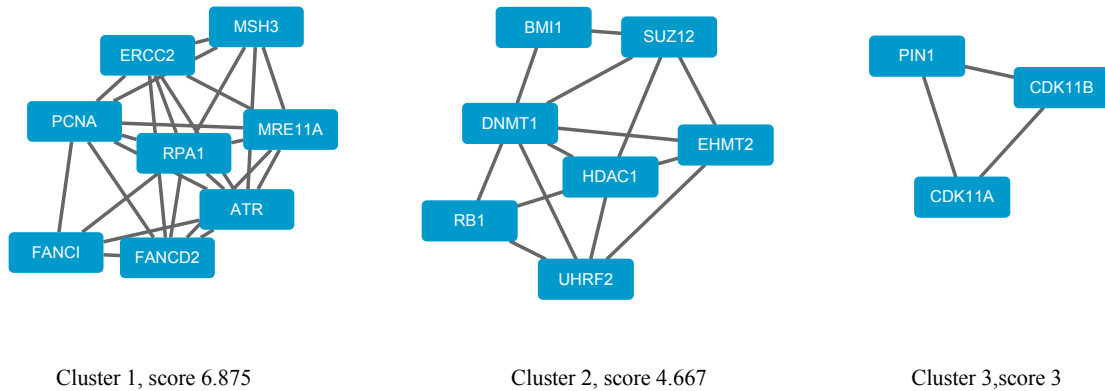

D

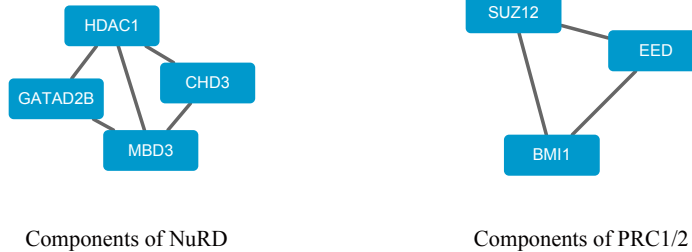

**Supplementary Figure 7. Analysis of the UHRF2 interactome.** (A) UHRF2 ectopic overexpression level in 4 gastric cancer cell lines. (B) UHRF2 was detected in USP7-IP experiment. (C) Three subnetworks recreated by MCODE analysis are shown. (D) Some components of chromatin-modifying complexes (CMCs) (NuRD, PRC1, PRC2) are shown.



## Supplemental tables

**Table S1. Summary of proteins identified in profiling of UHRF2-OE and control cells at 1% protein FDR with at least 1 unique peptide.** The table lists all proteins that were identified and quantified in 4 experiments at 1% protein FDR with at least 1 unique peptide. All proteins are listed with their corresponding FOT values in each experiment.

**Table S2. Summary of TFs and CoRs identified in TFRE experiments with at least 1 unique peptide.** The table lists all TFs and CoRs that were identified in 6 experiments with their corresponding iBAQ values. All TFs and CoRs were quantified in each experiment and the corresponding ratios of OE/Control are listed.

**Table S3. Signature peptides and parameters of PRM assay.**

**Table S4. UHRF2 interactors identified with Mass Spectrometry analysis.**

**Table S5. Information of protein and peptide identification of MS profiling data.** The accession number, number of unique peptides assigned for each protein, and % coverage of each protein assigned are contained in layer 1 of this table. The information of peptide identification including sequences, precursor charge, m/z, modifications, and identification scores is listed in layer 2.

**Table S6. Information of protein and peptide identification of TFRE data.**

**Table S7. Information of protein and peptide identification of IP data.**

**Table S3. Signature peptides and parameters of PRM assay.**

| GI number                  | Gene Name  | Peptide Sequence | Precursor Mz | Precursor Charge           | Product Mz  | Product Charge | Fragment Ion |   |     |
|----------------------------|------------|------------------|--------------|----------------------------|-------------|----------------|--------------|---|-----|
| gi 23312364                | UHRF2      | AQVFSCPACR       | 598.270975   | 2                          | 200.102967  | 1              | b2           |   |     |
|                            |            | AQVFSCPACR       | 598.270975   | 2                          | 299.171381  | 1              | b3           |   |     |
|                            |            | AQVFSCPACR       | 598.270975   | 2                          | 996.438983  | 1              | y8           |   |     |
|                            |            | AQVFSCPACR       | 598.270975   | 2                          | 897.370569  | 1              | y7           |   |     |
|                            |            | AQVFSCPACR       | 598.270975   | 2                          | 750.302155  | 1              | y6           |   |     |
|                            |            | AQVFSCPACR       | 598.270975   | 2                          | 663.270126  | 1              | y5           |   |     |
|                            |            | AQVFSCPACR       | 598.270975   | 2                          | 503.239478  | 1              | y4           |   |     |
| gi 4757960                 | CDH1       | TIFFCER          | 486.73402    | 2                          | 102.054955  | 1              | b1           |   |     |
|                            |            | TIFFCER          | 486.73402    | 2                          | 215.139019  | 1              | b2           |   |     |
|                            |            | TIFFCER          | 486.73402    | 2                          | 871.413085  | 1              | y6           |   |     |
|                            |            | TIFFCER          | 486.73402    | 2                          | 758.329021  | 1              | y5           |   |     |
|                            |            | TIFFCER          | 486.73402    | 2                          | 611.260607  | 1              | y4           |   |     |
|                            |            | TIFFCER          | 486.73402    | 2                          | 464.192193  | 1              | y3           |   |     |
|                            |            | TIFFCER          | 486.73402    | 2                          | 304.161545  | 1              | y2           |   |     |
|                            |            | TIFFCER          | 486.73402    | 2                          | 175.118952  | 1              | y1           |   |     |
|                            |            | TIFFCER          | 486.73402    | 2                          | 379.668149  | 2              | y5           |   |     |
|                            |            | MALEVG DYK       | 513.252242   | 2                          | 203.084874  | 1              | b2           |   |     |
|                            |            | MALEVG DYK       | 513.252242   | 2                          | 894.456724  | 1              | y8           |   |     |
|                            |            | MALEVG DYK       | 513.252242   | 2                          | 823.41961   | 1              | y7           |   |     |
|                            |            | MALEVG DYK       | 513.252242   | 2                          | 710.335546  | 1              | y6           |   |     |
|                            |            | MALEVG DYK       | 513.252242   | 2                          | 482.224539  | 1              | y4           |   |     |
|                            |            | MALEVG DYK       | 513.252242   | 2                          | 310.176132  | 1              | y2           |   |     |
|                            |            | gi 116534898     | DSG2         | VIQPHGGGSPLEGTQHLQDVPYVMVR | 732.875079  | 4              | 947.469354   | 1 | b10 |
|                            |            |                  |              | VIQPHGGGSPLEGTQHLQDVPYVMVR | 732.875079  | 4              | 288.168642   | 2 | b5  |
| VIQPHGGGSPLEGTQHLQDVPYVMVR | 732.875079 |                  |              | 4                          | 722.862597  | 2              | b15          |   |     |
| VIQPHGGGSPLEGTQHLQDVPYVMVR | 732.875079 |                  |              | 4                          | 1106.566291 | 1              | y9           |   |     |
| VIQPHGGGSPLEGTQHLQDVPYVMVR | 732.875079 |                  |              | 4                          | 764.412357  | 1              | y6           |   |     |
| VIQPHGGGSPLEGTQHLQDVPYVMVR | 732.875079 |                  |              | 4                          | 886.443428  | 2              | y15          |   |     |
| VIQPHGGGSPLEGTQHLQDVPYVMVR | 732.875079 |                  |              | 4                          | 821.922131  | 2              | y14          |   |     |
| VIQPHGGGSPLEGTQHLQDVPYVMVR | 732.875079 |                  |              | 4                          | 382.709816  | 2              | y6           |   |     |
| gi 327478416               | OCLN       | NFDTGLQEYK       | 607.788035   | 2                          | 262.118617  | 1              | b2           |   |     |
|                            |            | NFDTGLQEYK       | 607.788035   | 2                          | 838.430509  | 1              | y7           |   |     |
|                            |            | NFDTGLQEYK       | 607.788035   | 2                          | 737.382831  | 1              | y6           |   |     |
|                            |            | NFDTGLQEYK       | 607.788035   | 2                          | 310.176132  | 1              | y2           |   |     |

Table S4. UHRF2-interacting proteins as identified by mass spectrometry analysis

| GeneSymbol | cFAM             | complex | Reported interactors | PSMs   |          |          |            |             |               |               |                 |
|------------|------------------|---------|----------------------|--------|----------|----------|------------|-------------|---------------|---------------|-----------------|
|            |                  |         |                      | N87-OE | MKN45-OE | MKN74-OE | SGC7901-OE | N87-control | MKN45-control | MKN74-control | SGC7901-control |
| UHRF2      | RING, UBI-E3, TC |         |                      | 764    | 253      | 194      | 186        | 39          | 25            | 11            | 6               |
| USP7       | UBI-DUB          |         |                      | 148    | 49       | 51       | 19         | 4           | 2             | 2             | 2               |
| GMPS       |                  |         |                      | 87     | 28       | 24       | 6          | 1           | 0             | 1             | 0               |
| RPA1       | REPAIR           |         |                      | 63     | 19       | 11       | 5          | 1           | 0             | 0             | 0               |
| DNMT1      | TC               |         | DNMT1                | 50     | 12       | 2        | 0          | 1           | 1             | 0             | 0               |
| HDAC1      | TC               | NuRD    | HDAC1                | 47     | 13       | 5        | 6          | 0           | 1             | 0             | 1               |
| CDK11B     | TC, KI           |         |                      | 39     | 3        | 0        | 0          | 0           | 0             | 0             | 0               |
| BCLAF1     | TC               |         |                      | 37     | 3        | 0        | 0          | 0           | 0             | 0             | 0               |
| CDK11A     | TC               |         |                      | 36     | 3        | 0        | 0          | 0           | 0             | 0             | 0               |
| KIF4A      |                  |         |                      | 36     | 3        | 1        | 0          | 0           | 0             | 0             | 0               |
| CHD3       | TC, UBI-E3       | NuRD    |                      | 34     | 9        | 6        | 2          | 0           | 0             | 0             | 0               |
| CUL4B      |                  |         |                      | 28     | 5        | 5        | 7          | 1           | 1             | 1             | 1               |
| CTBP2      | TC               |         |                      | 27     | 8        | 2        | 1          | 4           | 0             | 0             | 0               |
| CDC73      | TC               |         |                      | 24     | 2        | 1        | 1          | 0           | 0             | 0             | 0               |
| PCNA       |                  |         | PCNA                 | 23     | 3        | 2        | 2          | 1           | 0             | 0             | 0               |
| CHERP      | UBI-UBD          |         |                      | 22     | 2        | 0        | 0          | 0           | 0             | 0             | 0               |
| PSMD5      | UBI-PRO          |         |                      | 22     | 7        | 0        | 2          | 2           | 0             | 0             | 0               |
| PUF60      |                  |         |                      | 20     | 7        | 5        | 0          | 1           | 0             | 0             | 0               |
| GATAD2B    | DBTF ZNF-GATA    | NuRD    |                      | 18     | 9        | 1        | 1          | 0           | 0             | 0             | 0               |
| LUC7L2     |                  |         |                      | 18     | 6        | 1        | 0          | 0           | 1             | 0             | 0               |
| FANCI      | REPAIR           |         |                      | 17     | 3        | 0        | 2          | 0           | 0             | 0             | 0               |
| MSH3       | REPAIR           |         |                      | 17     | 1        | 0        | 1          | 0           | 0             | 0             | 0               |
| ERCC2      | REPAIR, TC       |         |                      | 15     | 1        | 1        | 0          | 0           | 0             | 0             | 0               |
| NCAPG2     | TC               |         |                      | 15     | 1        | 0        | 0          | 0           | 0             | 0             | 0               |
| DIDO1      | CBTC             |         |                      | 14     | 2        | 1        | 0          | 0           | 0             | 0             | 0               |
| MRE11A     | REPAIR           |         |                      | 14     | 2        | 0        | 0          | 0           | 0             | 0             | 0               |
| NCAPD3     | TC               |         |                      | 14     | 2        | 0        | 0          | 0           | 0             | 0             | 0               |
| SUZ12      | TC               | PRC2    |                      | 14     | 3        | 0        | 0          | 1           | 0             | 0             | 0               |
| CHAF1B     | TC               |         |                      | 13     | 3        | 0        | 0          | 1           | 0             | 0             | 0               |
| LUC7L3     | PM               |         |                      | 13     | 6        | 1        | 0          | 0           | 0             | 0             | 0               |
| RCOR1      | DBTF HOMEO       |         |                      | 13     | 3        | 1        | 1          | 0           | 0             | 0             | 0               |
| KDM2A      | TC               |         |                      | 12     | 4        | 0        | 1          | 0           | 0             | 0             | 0               |
| ATR        | KI               |         |                      | 11     | 1        | 1        | 0          | 0           | 0             | 0             | 0               |
| FANCD2     |                  |         |                      | 11     | 1        | 0        | 0          | 0           | 0             | 0             | 0               |
| MBD3       | DBTC             | NuRD    |                      | 11     | 1        | 0        | 0          | 0           | 0             | 0             | 0               |
| NR2F2      | DBTF NHR         |         |                      | 11     | 1        | 3        | 0          | 0           | 0             | 0             | 0               |
| CDC16      |                  |         |                      | 10     | 1        | 0        | 1          | 0           | 0             | 0             | 0               |
| CHD8       | TC               |         |                      | 10     | 2        | 1        | 0          | 0           | 0             | 0             | 0               |
| PBRM1      | CBTC             |         |                      | 10     | 1        | 1        | 0          | 0           | 0             | 0             | 0               |
| EHMT2      | TC               |         | EHMT2                | 9      | 0        | 0        | 0          | 0           | 0             | 0             | 0               |
| RB1        | DBTF RB          |         | RB1                  | 9      | 1        | 0        | 0          | 0           | 0             | 0             | 0               |
| EED        |                  | PRC2    |                      | 8      | 1        | 0        | 0          | 0           | 0             | 0             | 0               |
| FBXL18     | UPS, UBI-FBX     |         |                      | 8      | 2        | 3        | 0          | 0           | 0             | 0             | 0               |
| KDM4B      | TC               |         |                      | 8      | 2        | 0        | 0          | 0           | 0             | 0             | 0               |
| BRD3       | TC, KI           |         |                      | 7      | 1        | 0        | 0          | 0           | 0             | 0             | 0               |
| CHD2       | TC, E2           |         |                      | 7      | 1        | 0        | 0          | 0           | 0             | 0             | 0               |
| TLK1       | KI               |         |                      | 7      | 1        | 0        | 0          | 0           | 0             | 0             | 0               |
| ZNF574     | DBTF ZNF-C2H2    |         |                      | 5      | 1        | 0        | 0          | 0           | 0             | 0             | 0               |
| BTA1F1     | TC               |         |                      | 4      | 2        | 2        | 0          | 0           | 0             | 0             | 0               |
| TCF7L2     | DBTF HMG         |         |                      | 3      | 1        | 0        | 0          | 0           | 0             | 0             | 0               |
| TFAP4      | DBTF HLH         |         |                      | 3      | 1        | 1        | 1          | 0           | 0             | 0             | 0               |
| BM11       | RING, UBI-E3     | PRC1    |                      | 2      | 1        | 0        | 0          | 0           | 0             | 0             | 0               |
| PCNP       |                  |         | PCNP                 | 2      | 1        | 0        | 0          | 0           | 0             | 0             | 0               |
| PIN1       | TC               |         |                      | 2      | 1        | 0        | 0          | 0           | 0             | 0             | 0               |
| UBE2D3     | UBI-E2           |         |                      | 2      | 1        | 0        | 0          | 0           | 0             | 0             | 0               |

## **Supplemental methods**

### **PRM**

Peptides were prepared from control and UHRF2-OE cells as described above. PRM was performed on Q-Exactive Plus mass spectrometer (Thermo). DDA full scans were processed with samples from control and UHRF2-OE cells to establish peptides library. The unique peptides with high intensity and confidence of each target protein were chosen. PRM methods (collision energy charge state, and retention times) were established and optimized according to information in library of selected peptides. Targeted MS2 spectra were acquired and the raw data were analyzed using Skyline, in which signal intensities for individual peptide sequences of each target protein were quantified.

### **ChIP-seq data analysis**

ChIP-Seq data were mapped to the reference genome hg19 using bowtie, only the uniquely mapped reads are used for the following analysis. Then the sam files were converted into bam files using samtools and 'rmdup' function from samtools was applied for removing potential PCR duplicates. Reads enrichment region (peak) was scanned from the whole genome using MACS14 with the default parameters and the appropriate control. Finally, known and predicted motifs were analyzed with HOMER limited in the default parameters.
